# Supplementary material
Source: Springer Nature journal article supplement (https://www.springermedizin.de/resource/supplementary/12913_2013_2950_MOESM6_ESM.pdf/9532010)

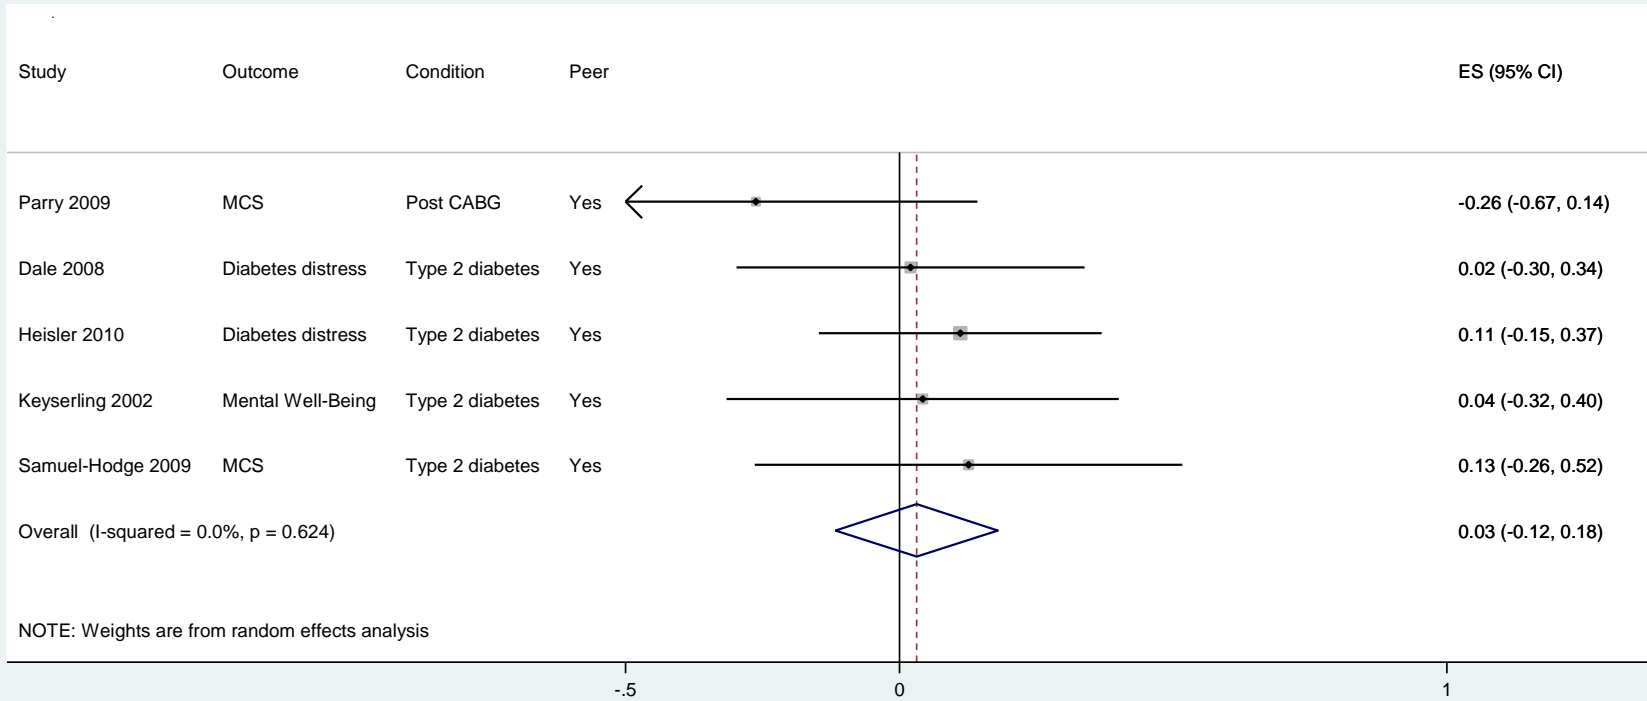

Supplement: MOESM6 [file 9532010]
